# Supplementary figures and images for: Promoting the role of patients in improving hand hygiene compliance amongst health care workers
Source: PubMed Central journal article supplement — BMJ Qual Improv Rep. 2016 Jul 8;5(1):u210787.w4336. doi: 10.1136/bmjquality.u210787.w4336 (PMC4964230; doi:10.1136/bmjquality.u210787.w4336), 2016-07-08

Figure 1

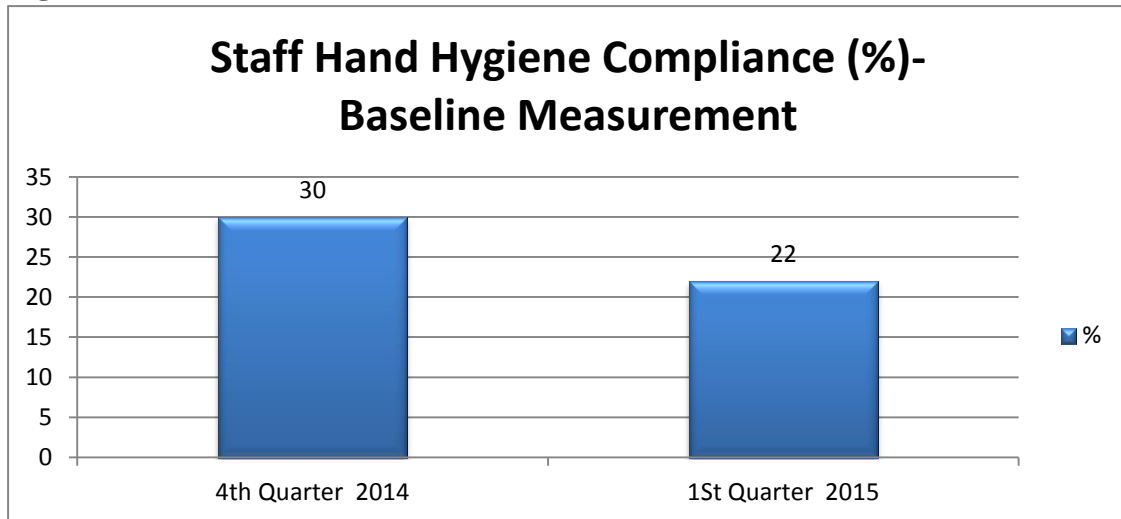

Figure 2: Hand Hygiene Compliance Process Flow Chart

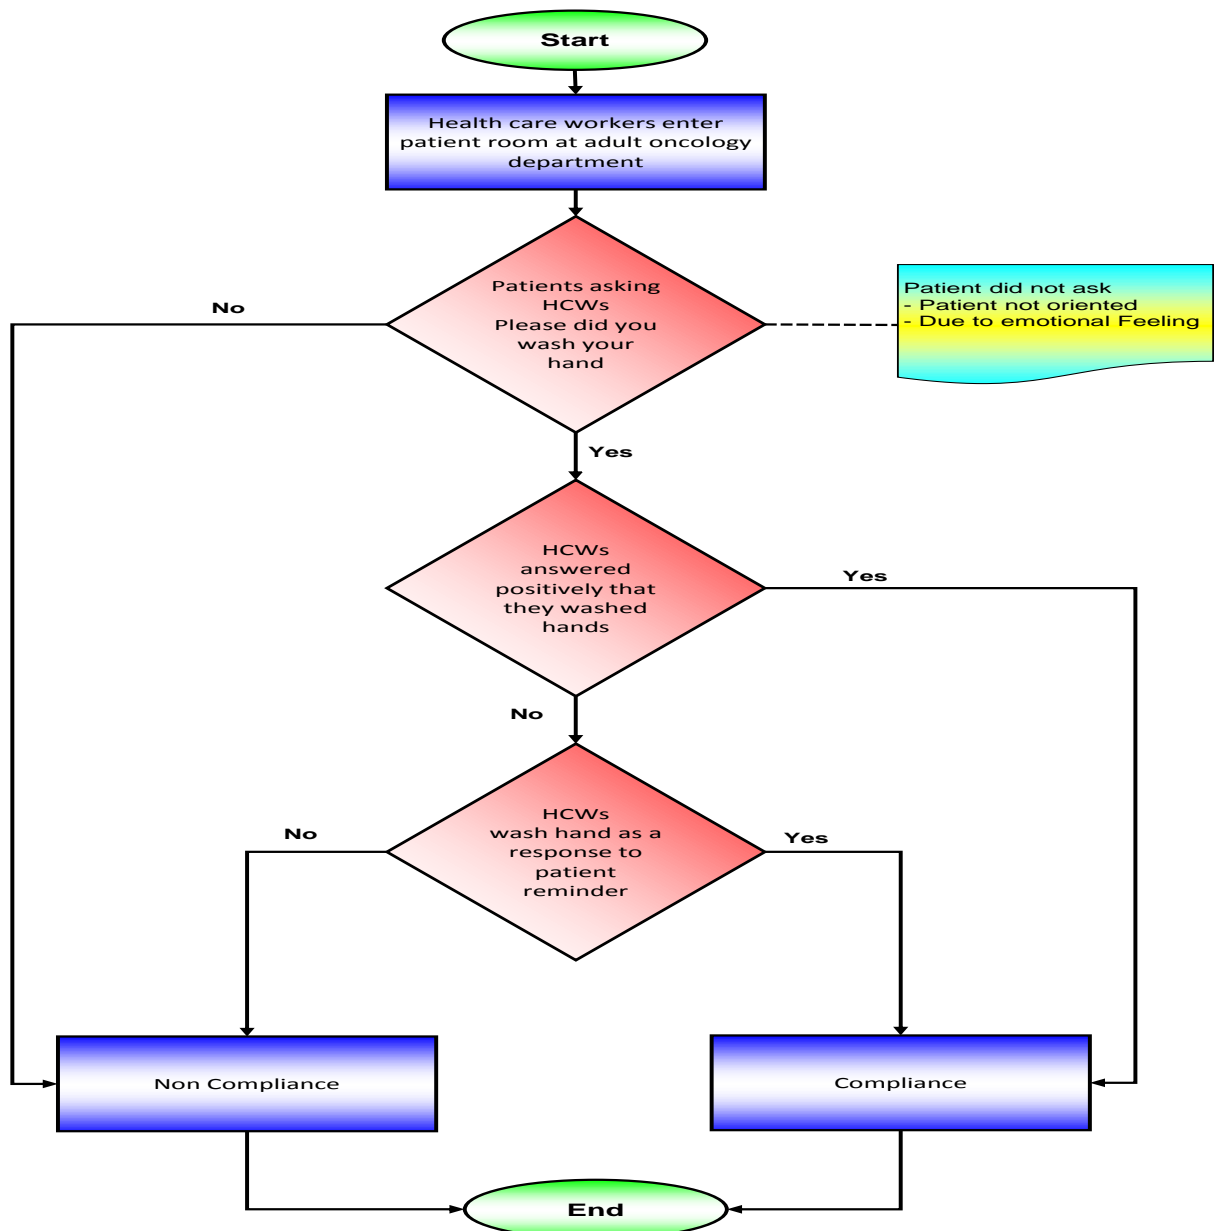

Supplement: bmjqir.u210787.w4336supp_figures.pdf [file bmjqir.u210787.w4336supp_figures.pdf]
